# Supplementary material for: Two Test Assembly Methods With Two Statistical Targets
Source: Front Psychol. 2022 Feb 11;13:786772. doi: 10.3389/fpsyg.2022.786772 (PMC8873185; doi:10.3389/fpsyg.2022.786772)
Supplement: Supplementary file 2 [file Data_Sheet_2.CSV]

	method	tcc	tic
1	MPD	0.139751604	0.146497282
2	MID	0.037348333	0.112320005
3	MPID	0.06130887	0.157627166
4	MIPD	0.108841059	0.103273135
5	MPD	0.202807988	0.315376063
6	MID	0.097941925	0.247347312
7	MPID	0.058183201	0.202383779
8	MIPD	0.121669226	0.188033333
9	MPD	0.185539074	0.313303207
10	MID	0.528874082	0.172237147
11	MPID	0.34883939	0.30260409
12	MIPD	0.17699573	0.160852329
13	MPD	0.768353491	0.519104197
14	MID	0.1104655	0.20630739
15	MPID	0.358755201	0.371380592
16	MIPD	0.156724282	0.219862689
17	MPD	0.14943835	0.601571964
18	MID	0.350274586	0.66998909
19	MPID	0.204779648	0.619844411
20	MIPD	0.066039482	0.501144901
21	MPD	0.189575867	0.698856397
22	MID	0.134708607	0.209674463
23	MPID	0.128731985	0.381321111
24	MIPD	0.093168386	0.342287746
25	MPD	0.181745458	0.491650672
26	MID	0.176326008	0.341276235
27	MPID	0.111328027	0.339295964
28	MIPD	0.17225785	0.369912873
29	MPD	0.322483623	1.312376922
30	MID	0.234148797	1.361248007
31	MPID	0.291455798	1.271579139
32	MIPD	0.286669982	1.337919915
33	MPD	0.214489539	0.220029223
34	MID	0.194705851	0.219489565
35	MPID	0.444127897	0.298905186
36	MIPD	0.326324635	0.221316026
37	MPD	0.161024008	0.319393743
38	MID	0.074469814	0.133333143
39	MPID	0.202392135	0.177687843
40	MIPD	0.192135724	0.196042878
41	MPD	0.311338442	0.670853992
42	MID	0.248282063	0.410757626
43	MPID	0.383820576	0.513626643
44	MIPD	0.238059156	0.43437009
45	MPD	0.402447598	1.128101261
46	MID	0.648788613	0.551198443
47	MPID	0.196912667	0.454061652
48	MIPD	0.12143996	0.247073612
49	MPD	0.363619698	0.40609795
50	MID	0.486468346	0.36337443
51	MPID	0.589590973	0.398200441
52	MIPD	0.427208318	0.442234689
53	MPD	0.26321994	0.495609045
54	MID	0.188096396	0.634442705
55	MPID	0.098060044	0.503117286
56	MIPD	0.147897559	0.440031213
57	MPD	0.072059339	0.70361252
58	MID	0.108357469	0.774342185
59	MPID	0.084706665	0.624522463
60	MIPD	0.063698614	0.741771007
61	MPD	0.153134063	0.300832733
62	MID	0.12292961	0.35173933
63	MPID	0.200923737	0.445697323
64	MIPD	0.103722606	0.360163056
65	MPD	0.167323337	0.308622215
66	MID	0.12371256	0.166871661
67	MPID	0.181540694	0.172755829
68	MIPD	0.159541033	0.180598387
69	MPD	0.184367981	0.572101842
70	MID	0.390050735	0.190958488
71	MPID	0.204259832	0.338262802
72	MIPD	0.25606952	0.300160092
73	MPD	0.224354656	0.36871574
74	MID	0.14510222	0.269234612
75	MPID	0.246046727	0.329389758
76	MIPD	0.144302295	0.241679811
77	MPD	0.076489799	0.314276117
78	MID	0.087700506	0.250977344
79	MPID	0.023381331	0.144364668
80	MIPD	0.054576179	0.269173657
81	MPD	0.111701697	0.310432723
82	MID	0.061415678	0.302157192
83	MPID	0.118335968	0.27787402
84	MIPD	0.105622828	0.276055129
85	MPD	0.216218119	0.796068627
86	MID	0.213979228	0.907320644
87	MPID	0.243859488	0.711402448
88	MIPD	0.234989876	0.998667627
89	MPD	0.091981725	0.318986912
90	MID	0.73145499	0.294746947
91	MPID	0.094744402	0.186317874
92	MIPD	0.208364877	0.161934253
93	MPD	0.089421336	0.19152239
94	MID	0.194438022	0.331042235
95	MPID	0.106602167	0.268338443
96	MIPD	0.0448579	0.284084661
97	MPD	0.364096123	0.160799843
98	MID	0.684932485	0.201170545
99	MPID	0.630626252	0.270886364
100	MIPD	0.569960711	0.198755521
101	MPD	0.084309345	0.254131016
102	MID	0.266477692	0.462462273
103	MPID	0.088494679	0.339290138
104	MIPD	0.066613282	0.256055011
105	MPD	0.094840688	0.236441106
106	MID	0.215613557	0.298264514
107	MPID	0.075706569	0.200641477
108	MIPD	0.260764426	0.38634285
109	MPD	0.082620384	0.351754558
110	MID	0.157705883	0.492148848
111	MPID	0.068827835	0.521446955
112	MIPD	0.28279166	0.408118465
113	MPD	0.158033458	0.401845004
114	MID	0.231505259	0.3593388
115	MPID	0.085563149	0.285746271
116	MIPD	0.154971585	0.317373678
117	MPD	0.075634013	0.275092892
118	MID	0.103499453	0.21660585
119	MPID	0.063901119	0.175967631
120	MIPD	0.123599232	0.258139205
121	MPD	0.506262154	0.787496779
122	MID	0.250473015	0.33179723
123	MPID	0.207130499	0.34281275
124	MIPD	0.204621189	0.309526335
125	MPD	0.100565637	0.353431332
126	MID	0.056715429	0.232915346
127	MPID	0.097658465	0.229325622
128	MIPD	0.20823315	0.22136479
129	MPD	0.17446119	0.421083402
130	MID	0.295216959	0.530943422
131	MPID	0.113691063	0.545852162
132	MIPD	0.301108185	0.496451165
133	MPD	0.16149445	0.623469578
134	MID	0.118679891	0.666494432
135	MPID	0.319684434	0.680173138
136	MIPD	0.173795201	0.553737595
137	MPD	0.16946262	0.620414651
138	MID	0.222801091	0.576511977
139	MPID	0.176445952	0.6181058
140	MIPD	0.172904924	0.486726825
141	MPD	0.529372951	0.46045662
142	MID	0.234081894	0.141776276
143	MPID	0.3544553	0.22415144
144	MIPD	0.489302271	0.220344688
145	MPD	0.422805597	0.336372668
146	MID	0.208482702	0.264159631
147	MPID	0.333576871	0.339663305
148	MIPD	0.399716955	0.285478193
149	MPD	0.222335701	0.477570829
150	MID	0.221520368	0.326757415
151	MPID	0.379430022	0.314282617
152	MIPD	0.221045916	0.266658162
153	MPD	0.151851559	0.209622494
154	MID	0.209862366	0.136526274
155	MPID	0.231168424	0.197414728
156	MIPD	0.138922128	0.171137169
157	MPD	0.152549681	0.639387969
158	MID	0.103703708	0.719795037
159	MPID	0.078941251	0.682921142
160	MIPD	0.116703274	0.651806246
161	MPD	0.038409808	0.058749499
162	MID	0.187363709	0.151934056
163	MPID	0.042662098	0.115476799
164	MIPD	0.053308991	0.059991749
165	MPD	0.148278863	0.256117511
166	MID	0.154662033	0.238174583
167	MPID	0.127070474	0.203618335
168	MIPD	0.111334864	0.198115659
169	MPD	0.275279958	0.374558618
170	MID	0.120690785	0.214013423
171	MPID	0.076113037	0.197395799
172	MIPD	0.049440052	0.124538995
173	MPD	0.132580472	0.207292165
174	MID	0.202840612	0.306014279
175	MPID	0.221984636	0.259405129
176	MIPD	0.206958172	0.276851404
177	MPD	0.069525784	0.33421577
178	MID	0.171984167	0.417960555
179	MPID	0.130696255	0.372763028
180	MIPD	0.111806183	0.438505861
181	MPD	0.206080161	0.406856955
182	MID	0.088751529	0.200229021
183	MPID	0.333242852	0.217043071
184	MIPD	0.168632406	0.240103347
185	MPD	0.455234132	0.552498637
186	MID	0.296187517	0.192626024
187	MPID	0.255568835	0.241735609
188	MIPD	0.299217828	0.306428599
189	MPD	0.279669744	0.330294912
190	MID	0.08083442	0.111813677
191	MPID	0.073794487	0.103126083
192	MIPD	0.085408887	0.135959829
193	MPD	0.453720667	0.298261787
194	MID	0.472316523	0.228199871
195	MPID	0.38823943	0.190571572
196	MIPD	0.154462469	0.207194216
197	MPD	0.16583152	0.771731211
198	MID	0.101810743	0.692233402
199	MPID	0.232075337	0.653460404
200	MIPD	0.086527179	0.607761834
201	MPD	0.071093595	0.339497306
202	MID	0.549475826	0.18137088
203	MPID	0.213095114	0.24351979
204	MIPD	0.29250187	0.181038861
205	MPD	0.133890502	0.360953845
206	MID	0.193942427	0.21457027
207	MPID	0.201269533	0.197068423
208	MIPD	0.185499204	0.169589139
209	MPD	0.425081063	0.454610871
210	MID	0.659398211	0.58958798
211	MPID	0.76079403	0.580527091
212	MIPD	0.476864796	0.573021702
213	MPD	0.064899284	0.128543795
214	MID	0.492881818	0.351430372
215	MPID	0.117759716	0.222037719
216	MIPD	0.151546003	0.203100566
217	MPD	0.164490757	0.223194406
218	MID	0.559760697	0.314689519
219	MPID	0.153915224	0.186299414
220	MIPD	0.207530283	0.19878917
221	MPD	0.300485709	0.382854711
222	MID	0.496253414	0.212904533
223	MPID	0.286120704	0.370782307
224	MIPD	0.403885669	0.243225512
225	MPD	0.104500481	0.243532248
226	MID	0.101311955	0.317822689
227	MPID	0.108695392	0.25449547
228	MIPD	0.097638267	0.340922372
229	MPD	0.400897965	0.533047682
230	MID	0.068020274	0.43783686
231	MPID	0.260131767	0.443321096
232	MIPD	0.302800139	0.425717512
233	MPD	0.040067786	0.124333199
234	MID	0.062032179	0.170791872
235	MPID	0.097148654	0.134420242
236	MIPD	0.127080203	0.153047617
237	MPD	0.188871486	0.274039775
238	MID	0.149389286	0.265335276
239	MPID	0.194837291	0.209782163
240	MIPD	0.300922999	0.28002323
241	MPD	0.669078419	0.776054437
242	MID	0.927222271	0.338777359
243	MPID	0.67666932	0.692479869
244	MIPD	0.906302347	0.64363598
245	MPD	0.220394179	0.306834804
246	MID	0.167825013	0.108039308
247	MPID	0.15740224	0.158912931
248	MIPD	0.072991925	0.134498284
249	MPD	0.136236349	0.249653839
250	MID	0.090662464	0.145560808
251	MPID	0.076502005	0.220604659
252	MIPD	0.143677547	0.19956255
253	MPD	0.288815309	0.546188804
254	MID	0.425367158	0.377421926
255	MPID	0.265899183	0.29383952
256	MIPD	0.431608352	0.332844955
257	MPD	0.133744453	0.479690555
258	MID	0.087472402	0.374275184
259	MPID	0.123429749	0.374242345
260	MIPD	0.048014586	0.348599832
261	MPD	0.148199932	0.464738706
262	MID	0.041564447	0.357572419
263	MPID	0.072830202	0.297779818
264	MIPD	0.06690144	0.312687679
265	MPD	0.194214925	0.326228785
266	MID	0.184101767	0.298141788
267	MPID	0.075584043	0.249574785
268	MIPD	0.053556901	0.231815386
269	MPD	0.200542384	0.429700322
270	MID	0.620709319	0.427408798
271	MPID	0.100338036	0.398478962
272	MIPD	0.109000429	0.332383402
273	MPD	0.39952488	1.143214371
274	MID	0.555650844	1.058820544
275	MPID	0.388937771	0.934887248
276	MIPD	0.512616073	0.961691497
277	MPD	0.234333598	0.463930977
278	MID	0.387401038	0.659793516
279	MPID	0.45096081	0.586684007
280	MIPD	0.412469406	0.526850792
281	MPD	0.275651075	0.455858575
282	MID	0.419469716	0.476116819
283	MPID	0.145050776	0.406952773
284	MIPD	0.113253425	0.388207174
285	MPD	0.135476495	0.448689126
286	MID	0.240408756	0.347622831
287	MPID	0.216825389	0.447246087
288	MIPD	0.216480862	0.389476761
289	MPD	0.189145549	0.291534594
290	MID	0.0571595	0.137941208
291	MPID	0.128185243	0.121211588
292	MIPD	0.118752926	0.132182235
293	MPD	0.170486808	0.211585222
294	MID	0.315278392	0.1371637
295	MPID	0.045063015	0.214885684
296	MIPD	0.056857694	0.177891475
297	MPD	0.189868693	0.353130027
298	MID	0.162223074	0.522223898
299	MPID	0.151090007	0.402355209
300	MIPD	0.112319095	0.483290215
301	MPD	0.543067252	0.573327864
302	MID	0.607330084	0.072996227
303	MPID	0.28440267	0.148019468
304	MIPD	0.406087841	0.205733861
305	MPD	0.062622451	0.236755766
306	MID	0.096054773	0.229351911
307	MPID	0.08457032	0.179497602
308	MIPD	0.062924093	0.185231812
309	MPD	0.102039067	0.33868814
310	MID	0.158527702	0.426090931
311	MPID	0.082108151	0.457110533
312	MIPD	0.111558933	0.460213745
313	MPD	0.165219803	0.304584727
314	MID	0.307102667	0.238313116
315	MPID	0.255680325	0.289983306
316	MIPD	0.124598717	0.187127875
317	MPD	0.265230243	0.568534327
318	MID	0.18775276	0.329655187
319	MPID	0.25337136	0.308300722
320	MIPD	0.120403915	0.301151478
321	MPD	0.11919487	0.238724415
322	MID	0.540689277	0.108990401
323	MPID	0.229858561	0.100169928
324	MIPD	0.239993247	0.188225275
325	MPD	0.248759851	0.643566746
326	MID	0.17313437	0.449105607
327	MPID	0.452750946	0.634171184
328	MIPD	0.220111299	0.52707982
329	MPD	0.143281428	0.22295552
330	MID	0.060735501	0.153811398
331	MPID	0.100371134	0.132617356
332	MIPD	0.110330711	0.151950338
333	MPD	0.519337565	0.335069689
334	MID	0.100519074	0.189687974
335	MPID	0.301093233	0.1962235
336	MIPD	0.116430908	0.076182187
337	MPD	0.817526911	0.376337214
338	MID	0.46813561	0.149278455
339	MPID	0.609111519	0.204663712
340	MIPD	0.345804583	0.140648507
341	MPD	0.207637428	0.666088907
342	MID	0.187205942	0.248212326
343	MPID	0.101237113	0.310363062
344	MIPD	0.177968958	0.30004503
345	MPD	0.51966801	0.722848085
346	MID	0.20117261	0.276710492
347	MPID	0.123749125	0.183021649
348	MIPD	0.202875039	0.253252065
349	MPD	0.312689663	0.313369254
350	MID	0.133757567	0.25304573
351	MPID	0.188707807	0.270355568
352	MIPD	0.139106108	0.284093338
353	MPD	0.269031074	0.353829834
354	MID	0.451679475	0.182199934
355	MPID	0.100121967	0.2952576
356	MIPD	0.128793563	0.201014936
357	MPD	0.427927676	0.223871697
358	MID	0.170913461	0.3722283
359	MPID	0.141167671	0.147550961
360	MIPD	0.306186527	0.235800085
361	MPD	0.467691152	0.896894269
362	MID	0.434664781	0.343218668
363	MPID	0.457773328	0.522248734
364	MIPD	0.380695504	0.488991878
365	MPD	0.05103473	0.495718629
366	MID	0.099812343	0.436643277
367	MPID	0.076002428	0.439097353
368	MIPD	0.037871408	0.400430415
369	MPD	0.177988425	0.452779326
370	MID	0.156972153	0.252792992
371	MPID	0.110838163	0.288745838
372	MIPD	0.085257486	0.270132396
373	MPD	0.074097048	0.17450869
374	MID	0.215189284	0.191080556
375	MPID	0.099750146	0.140166576
376	MIPD	0.232481804	0.144595326
377	MPD	0.090319394	0.255138642
378	MID	0.127331697	0.266978036
379	MPID	0.106349967	0.325372591
380	MIPD	0.13600708	0.356722522
381	MPD	0.220539521	0.43076574
382	MID	0.44860509	0.59140548
383	MPID	0.235860512	0.3884426
384	MIPD	0.313939483	0.404040303
385	MPD	0.102591715	0.336421327
386	MID	0.280345326	0.378332586
387	MPID	0.223764328	0.436736394
388	MIPD	0.171565289	0.296303832
389	MPD	0.256487875	0.536283694
390	MID	0.268673428	0.433285565
391	MPID	0.16367629	0.472308704
392	MIPD	0.162288532	0.402184438
393	MPD	0.133941379	0.425177625
394	MID	0.280402263	0.57765506
395	MPID	0.164495069	0.47684889
396	MIPD	0.214156031	0.604766863
397	MPD	0.212262793	0.342071809
398	MID	0.330659263	0.225041938
399	MPID	0.179161822	0.136363911
400	MIPD	0.181016442	0.218467614
401	MPD	0.13473741	0.823892469
402	MID	0.128196817	0.816349129
403	MPID	0.103527447	0.774291152
404	MIPD	0.174902939	0.765104811
405	MPD	0.259242452	0.679393089
406	MID	0.527389445	0.405811333
407	MPID	0.390245709	0.418532735
408	MIPD	0.24194272	0.427904482
409	MPD	0.23537938	0.342304871
410	MID	0.120532927	0.375398722
411	MPID	0.093169155	0.297825315
412	MIPD	0.086864659	0.351924668
413	MPD	0.249356916	0.6161103
414	MID	0.207111483	0.313610561
415	MPID	0.105353451	0.326404792
416	MIPD	0.217242145	0.455220231
417	MPD	0.246876108	0.197543074
418	MID	0.348907046	0.178181625
419	MPID	0.139911617	0.112028227
420	MIPD	0.090282256	0.150241353
421	MPD	0.062221626	0.251134105
422	MID	0.144119752	0.322514048
423	MPID	0.114717385	0.311967574
424	MIPD	0.223799363	0.382184781
425	MPD	0.183638226	0.215506916
426	MID	0.297662722	0.184363098
427	MPID	0.194753616	0.247052299
428	MIPD	0.280534824	0.231611257
429	MPD	0.255515488	0.282121348
430	MID	0.161594834	0.245667301
431	MPID	0.095482268	0.365336998
432	MIPD	0.194120187	0.247870343
433	MPD	0.305268748	0.272979289
434	MID	0.205148237	0.207583279
435	MPID	0.113765523	0.168957914
436	MIPD	0.25117329	0.23989664
437	MPD	0.09928573	0.448132376
438	MID	0.14020035	0.301658062
439	MPID	0.123377155	0.181741585
440	MIPD	0.12593432	0.351940432
441	MPD	0.72688769	1.018084174
442	MID	0.206323013	0.594955443
443	MPID	0.285836249	0.611384933
444	MIPD	0.26178919	0.652401582
445	MPD	0.273742921	0.526574335
446	MID	0.390819731	0.908842066
447	MPID	0.18753612	0.54302463
448	MIPD	0.334632017	0.671843014
449	MPD	0.066972858	0.261953773
450	MID	0.041786256	0.146082405
451	MPID	0.1200346	0.189285575
452	MIPD	0.255589351	0.257417913
453	MPD	0.165477263	0.305901075
454	MID	0.150363433	0.240443695
455	MPID	0.197930078	0.215091768
456	MIPD	0.256691634	0.16433556
457	MPD	0.292668428	0.612377996
458	MID	0.235077167	0.508507408
459	MPID	0.259013311	0.54553154
460	MIPD	0.175923006	0.493120431
461	MPD	0.151616904	0.153259887
462	MID	0.079070436	0.245850722
463	MPID	0.227541987	0.206422937
464	MIPD	0.1137111	0.151489475
465	MPD	0.168931748	0.223304485
466	MID	0.083070268	0.163717074
467	MPID	0.053306716	0.126152172
468	MIPD	0.193598942	0.161594087
469	MPD	0.118518858	0.17858802
470	MID	0.25544149	0.197435774
471	MPID	0.18043692	0.123534505
472	MIPD	0.149761313	0.160044091
473	MPD	0.168199504	0.189703167
474	MID	0.237900625	0.333798633
475	MPID	0.075211378	0.295353966
476	MIPD	0.192154538	0.278091321
477	MPD	0.096341555	0.175622536
478	MID	0.095172135	0.214261194
479	MPID	0.082593209	0.179222995
480	MIPD	0.179713495	0.2459003
481	MPD	0.133210462	0.313924888
482	MID	0.07209818	0.297881275
483	MPID	0.121168525	0.180516643
484	MIPD	0.098420215	0.241076098
485	MPD	0.469348936	0.349318119
486	MID	0.834560407	0.52917534
487	MPID	0.541566515	0.426618442
488	MIPD	0.466122815	0.313923925
489	MPD	0.12178968	0.139767454
490	MID	0.054641501	0.290303909
491	MPID	0.064499718	0.199979962
492	MIPD	0.072180335	0.282283466
493	MPD	0.251567642	0.275279692
494	MID	0.936300456	0.523888322
495	MPID	0.600431338	0.292640969
496	MIPD	0.50412546	0.341997742
497	MPD	0.188015569	0.473010602
498	MID	0.087377222	0.184028029
499	MPID	0.039536402	0.148675748
500	MIPD	0.247703553	0.178804119
501	MPD	0.373342349	0.386741404
502	MID	0.379735072	0.642616671
503	MPID	0.533564362	0.475149977
504	MIPD	0.41622416	0.538389875
505	MPD	0.266881237	0.381531545
506	MID	0.466069505	0.304379805
507	MPID	0.143083268	0.208419861
508	MIPD	0.051362131	0.156900398
509	MPD	0.266836301	0.51898507
510	MID	0.198089806	0.356623333
511	MPID	0.140961577	0.420296254
512	MIPD	0.16889814	0.300451785
513	MPD	0.226049138	0.437486563
514	MID	0.194055299	0.247832955
515	MPID	0.190747832	0.235838432
516	MIPD	0.097432986	0.204847279
517	MPD	0.205994379	1.096346274
518	MID	0.359913551	1.18317177
519	MPID	0.272706397	1.328368097
520	MIPD	0.208487759	0.87846956
521	MPD	0.318448415	0.679790559
522	MID	0.53439198	0.577178213
523	MPID	0.331535212	0.581285045
524	MIPD	0.290098862	0.629075248
525	MPD	0.097292863	0.233167908
526	MID	0.148975569	0.20668776
527	MPID	0.143422204	0.206479048
528	MIPD	0.146155826	0.204367546
529	MPD	0.154083223	0.426716566
530	MID	0.154389874	0.372900153
531	MPID	0.102709552	0.400726755
532	MIPD	0.083212098	0.400532798
533	MPD	0.147973051	0.263617174
534	MID	0.260084877	0.209908514
535	MPID	0.246100961	0.176870618
536	MIPD	0.349757894	0.193981667
537	MPD	0.194131407	0.409718284
538	MID	0.205635404	0.204579816
539	MPID	0.108938174	0.164240196
540	MIPD	0.047575085	0.130318969
541	MPD	0.096921265	0.23137432
542	MID	0.145078998	0.175381389
543	MPID	0.071584898	0.217510996
544	MIPD	0.121879559	0.126815955
545	MPD	0.17367429	0.244379688
546	MID	0.190938144	0.232885856
547	MPID	0.101685602	0.202547401
548	MIPD	0.082474301	0.237624249
549	MPD	0.048695378	0.129138902
550	MID	0.08893713	0.141367038
551	MPID	0.074249161	0.090696459
552	MIPD	0.174941323	0.134097184
553	MPD	0.452352883	0.432277045
554	MID	0.324331658	0.215379319
555	MPID	0.213043691	0.187380594
556	MIPD	0.285202674	0.195391497
557	MPD	0.224498623	0.365658448
558	MID	0.149999706	0.28581743
559	MPID	0.195042712	0.232812967
560	MIPD	0.250906857	0.269808522
561	MPD	0.363454616	0.340748815
562	MID	0.240854679	0.177922786
563	MPID	0.160075844	0.134143998
564	MIPD	0.116094634	0.140430453
565	MPD	0.628901285	0.729391855
566	MID	0.668696806	0.231016021
567	MPID	0.46519079	0.301275839
568	MIPD	0.296068919	0.321304043
569	MPD	0.229594674	0.441007024
570	MID	0.281670756	0.636861136
571	MPID	0.415037062	0.611849936
572	MIPD	0.181534305	0.658490814
573	MPD	0.207618014	0.299895531
574	MID	0.147593437	0.198964024
575	MPID	0.211994538	0.215877897
576	MIPD	0.08137289	0.215331788
577	MPD	0.234980221	0.410585727
578	MID	0.184997249	0.262854333
579	MPID	0.087717336	0.302044444
580	MIPD	0.124509794	0.296600192
581	MPD	0.273692478	0.356740104
582	MID	0.306056212	0.194728692
583	MPID	0.095557185	0.219267204
584	MIPD	0.103241139	0.168655713
585	MPD	0.096843177	0.32292039
586	MID	0.033422405	0.103541219
587	MPID	0.042345837	0.120827669
588	MIPD	0.091620844	0.11281746
589	MPD	0.194437103	0.216860571
590	MID	0.243117737	0.258434629
591	MPID	0.324610511	0.172164493
592	MIPD	0.139230529	0.175832494
593	MPD	0.380758326	0.32326369
594	MID	0.685611007	0.436871414
595	MPID	0.472184944	0.292848251
596	MIPD	0.463724645	0.329060316
597	MPD	0.374965738	0.25246391
598	MID	0.554301301	0.250340623
599	MPID	0.433705354	0.196090221
600	MIPD	0.300347691	0.252977689
601	MPD	0.427764421	0.308631842
602	MID	1.201628312	0.827284698
603	MPID	0.654398514	0.40716736
604	MIPD	0.53185261	0.348104091
605	MPD	0.125738747	0.433086951
606	MID	0.113566526	0.626948718
607	MPID	0.192029457	0.344681651
608	MIPD	0.130272956	0.559430598
609	MPD	0.116532267	0.451040049
610	MID	0.088941821	0.322705456
611	MPID	0.062102304	0.274382213
612	MIPD	0.14388136	0.272467586
613	MPD	0.17395774	0.389400047
614	MID	0.197669184	0.42391221
615	MPID	0.098088089	0.329638698
616	MIPD	0.131909537	0.283483724
617	MPD	0.12073758	0.390550283
618	MID	0.310990865	0.152901846
619	MPID	0.100246016	0.155121102
620	MIPD	0.185994347	0.22833742
621	MPD	0.292042954	0.486229662
622	MID	0.277848274	0.213585013
623	MPID	0.25333683	0.266424158
624	MIPD	0.155187828	0.278918796
625	MPD	0.190381489	0.522046848
626	MID	0.351654506	0.52807362
627	MPID	0.111289924	0.4503581
628	MIPD	0.202483694	0.482524197
629	MPD	0.233544686	0.632889207
630	MID	0.163019303	0.390586697
631	MPID	0.093143066	0.366918879
632	MIPD	0.052708031	0.343973112
633	MPD	0.286190162	0.412564
634	MID	0.208436795	0.299075237
635	MPID	0.155160375	0.241058179
636	MIPD	0.156870061	0.238457577
637	MPD	0.126401528	0.195661178
638	MID	0.238347775	0.133917049
639	MPID	0.110436929	0.132903138
640	MIPD	0.200669056	0.17736962
641	MPD	0.13303451	0.274043635
642	MID	0.276491267	0.226871136
643	MPID	0.141199715	0.181470119
644	MIPD	0.244296993	0.290485051
645	MPD	0.061091197	0.278281653
646	MID	0.145995564	0.303395928
647	MPID	0.037676367	0.235937679
648	MIPD	0.064765054	0.21013876
649	MPD	0.218737048	0.308197057
650	MID	0.31649077	0.312490422
651	MPID	0.181811043	0.394773112
652	MIPD	0.082212233	0.213517336
653	MPD	0.152330199	0.313433303
654	MID	0.084193472	0.26089484
655	MPID	0.144956774	0.246384966
656	MIPD	0.046719632	0.260029027
657	MPD	0.058459003	0.154839224
658	MID	0.103597515	0.12526116
659	MPID	0.06303596	0.102812023
660	MIPD	0.178123851	0.109934336
661	MPD	0.16746577	0.392331875
662	MID	0.138445584	0.243637508
663	MPID	0.094107887	0.148642262
664	MIPD	0.109728658	0.232386997
665	MPD	0.358321234	0.655828212
666	MID	0.356329769	0.394399038
667	MPID	0.261767487	0.564678221
668	MIPD	0.365810843	0.532203477
669	MPD	0.42856247	0.519191324
670	MID	0.14565751	0.329103677
671	MPID	0.24174298	0.316383836
672	MIPD	0.330176449	0.372870276
673	MPD	0.354619986	0.252389901
674	MID	0.385262285	0.164036306
675	MPID	0.272158969	0.1685596
676	MIPD	0.535240619	0.176640518
677	MPD	0.371021614	0.473773321
678	MID	0.47107788	0.176060434
679	MPID	0.350970449	0.189499448
680	MIPD	0.167761715	0.147748177
681	MPD	0.388958651	0.272855099
682	MID	0.523024012	0.071629735
683	MPID	0.393324894	0.12622721
684	MIPD	0.472810996	0.093706852
685	MPD	0.277245365	0.517424254
686	MID	0.342202041	0.235424075
687	MPID	0.368020123	0.278249006
688	MIPD	0.186869317	0.18452508
689	MPD	0.121051126	0.287747721
690	MID	0.073280682	0.137928031
691	MPID	0.034344148	0.149921852
692	MIPD	0.12490564	0.173573759
693	MPD	0.166152073	0.387617857
694	MID	0.319293757	0.393200704
695	MPID	0.282203038	0.317281493
696	MIPD	0.253153703	0.342389163
697	MPD	0.380417518	0.322433488
698	MID	0.280429624	0.20357188
699	MPID	0.146187817	0.132896609
700	MIPD	0.199494707	0.151053235
701	MPD	0.279385167	0.523813317
702	MID	0.277697913	0.128142113
703	MPID	0.078047536	0.152403664
704	MIPD	0.098112393	0.152630161
705	MPD	0.128594967	0.184858982
706	MID	0.155269501	0.262807004
707	MPID	0.093474484	0.21824544
708	MIPD	0.131500901	0.185799536
709	MPD	0.196892084	0.539165512
710	MID	0.194090917	0.793841172
711	MPID	0.173245219	0.605806753
712	MIPD	0.366973457	0.772515137
713	MPD	0.118735807	0.418950483
714	MID	0.178344497	0.303879566
715	MPID	0.222679246	0.318274699
716	MIPD	0.272130438	0.31109172
717	MPD	0.259470841	0.375223125
718	MID	0.599887393	0.196291189
719	MPID	0.236609591	0.196970478
720	MIPD	0.256997518	0.192165373
721	MPD	0.193286092	0.448528169
722	MID	0.375645281	0.264965123
723	MPID	0.249241821	0.229456772
724	MIPD	0.242941863	0.218464294
725	MPD	0.183709966	0.257988008
726	MID	0.442708658	0.178864271
727	MPID	0.269070423	0.121071821
728	MIPD	0.377862264	0.231133359
729	MPD	0.325148247	0.671213937
730	MID	0.288391227	0.221764153
731	MPID	0.215853947	0.156243809
732	MIPD	0.209294274	0.368856463
733	MPD	0.301998892	0.579293864
734	MID	0.327039148	0.44967174
735	MPID	0.260071246	0.464790999
736	MIPD	0.197264314	0.378260831
737	MPD	0.206652765	0.411494739
738	MID	0.138662388	0.542086823
739	MPID	0.183641772	0.498742191
740	MIPD	0.113564219	0.511180186
741	MPD	0.31549534	0.579813049
742	MID	0.15355404	0.266423472
743	MPID	0.249330046	0.304686502
744	MIPD	0.201699617	0.407022055
745	MPD	0.399157917	0.702549565
746	MID	0.166287421	0.266161505
747	MPID	0.256749862	0.295847439
748	MIPD	0.153643402	0.27883038
749	MPD	0.136646348	0.385985757
750	MID	0.346166706	0.481958956
751	MPID	0.318909673	0.537733426
752	MIPD	0.366211122	0.443646822
753	MPD	0.100852381	0.482305033
754	MID	0.201371686	0.651881947
755	MPID	0.068152303	0.597700701
756	MIPD	0.200263757	0.603617913
757	MPD	0.149774985	0.208730131
758	MID	0.189737587	0.104650726
759	MPID	0.17102184	0.131201475
760	MIPD	0.187787381	0.177239156
761	MPD	0.767945578	0.541885872
762	MID	0.295689414	0.231541563
763	MPID	0.394700788	0.215988234
764	MIPD	0.411736827	0.207548373
765	MPD	0.139659948	0.556571558
766	MID	0.178630291	0.921419062
767	MPID	0.258998005	1.009271457
768	MIPD	0.305401826	0.73281701
769	MPD	0.292614705	0.375788371
770	MID	0.649051558	0.312476542
771	MPID	0.343333969	0.214075022
772	MIPD	0.185109336	0.194809737
773	MPD	0.35471702	0.371622142
774	MID	0.334534596	0.165503496
775	MPID	0.217372266	0.234412223
776	MIPD	0.417867437	0.37255888
777	MPD	0.273378906	0.685472095
778	MID	0.171476414	0.524546894
779	MPID	0.108021039	0.48296363
780	MIPD	0.142686771	0.567791714
781	MPD	0.254099919	0.331343607
782	MID	0.156040834	0.281107124
783	MPID	0.147594875	0.207816581
784	MIPD	0.184634671	0.225498767
785	MPD	0.077847322	0.182491716
786	MID	0.127256816	0.272024882
787	MPID	0.21558749	0.211566542
788	MIPD	0.10262559	0.153491181
789	MPD	0.122659164	0.137940322
790	MID	0.253699273	0.210495636
791	MPID	0.121056897	0.117061898
792	MIPD	0.138254057	0.153567432
793	MPD	0.251748647	0.689577223
794	MID	0.249750867	0.599319939
795	MPID	0.088960512	0.478258565
796	MIPD	0.133135496	0.547139585
797	MPD	0.178741968	0.841351794
798	MID	0.105030134	0.596442387
799	MPID	0.431726567	0.587959994
800	MIPD	0.142200043	0.626438164
801	MPD	0.144450031	0.374629232
802	MID	0.054200317	0.399104552
803	MPID	0.117923351	0.348596049
804	MIPD	0.125112026	0.462777426
805	MPD	0.099801268	0.320607889
806	MID	0.365020526	0.539761805
807	MPID	0.222862699	0.338596927
808	MIPD	0.122190867	0.346318604
809	MPD	0.29276699	0.283019003
810	MID	0.219089852	0.280198079
811	MPID	0.213434111	0.16157868
812	MIPD	0.319211565	0.209329521
813	MPD	0.089579603	0.268203127
814	MID	0.125773135	0.338071335
815	MPID	0.085666444	0.178966767
816	MIPD	0.150809564	0.254721598
817	MPD	0.114384315	0.305867112
818	MID	0.230667687	0.402053668
819	MPID	0.112360377	0.231724576
820	MIPD	0.25645738	0.348001143
821	MPD	0.140255374	0.258680079
822	MID	0.053997208	0.210623173
823	MPID	0.075968658	0.149571383
824	MIPD	0.114444277	0.195047846
825	MPD	0.248097689	0.652902957
826	MID	0.145174111	0.27008837
827	MPID	0.160153596	0.258948428
828	MIPD	0.134365281	0.322073387
829	MPD	0.15421628	0.345692307
830	MID	0.384695636	0.334374613
831	MPID	0.130648065	0.337623971
832	MIPD	0.13030721	0.3203004
833	MPD	0.17530989	0.483538754
834	MID	0.087531641	0.142672662
835	MPID	0.075461456	0.153007301
836	MIPD	0.177372691	0.163805298
837	MPD	0.120308857	0.317517077
838	MID	0.103603255	0.2010106
839	MPID	0.047634987	0.173370845
840	MIPD	0.098250082	0.137348365
841	MPD	0.145612621	0.29224044
842	MID	0.229372942	0.166126269
843	MPID	0.108441343	0.140967241
844	MIPD	0.177933896	0.171701799
845	MPD	0.230290713	0.366007093
846	MID	0.145402479	0.270102763
847	MPID	0.088551065	0.295326006
848	MIPD	0.293464272	0.373895564
849	MPD	0.230868864	0.23056118
850	MID	0.282949065	0.2724904
851	MPID	0.257853788	0.320093128
852	MIPD	0.194087064	0.251730721
853	MPD	0.510250305	0.481407618
854	MID	0.410137936	0.104572197
855	MPID	0.352003787	0.256416157
856	MIPD	0.242830927	0.154378793
857	MPD	0.208062314	0.267480181
858	MID	0.238836231	0.41106948
859	MPID	0.152249324	0.400925398
860	MIPD	0.142522478	0.33395483
861	MPD	0.120539032	0.444331631
862	MID	0.256390148	0.272432794
863	MPID	0.114646632	0.418533167
864	MIPD	0.145404359	0.265120103
865	MPD	0.204161628	0.284430258
866	MID	0.119823218	0.117934015
867	MPID	0.094006777	0.045280126
868	MIPD	0.061298096	0.074769943
869	MPD	0.062816086	0.214176544
870	MID	0.133423732	0.321403056
871	MPID	0.180709129	0.285901112
872	MIPD	0.19531934	0.258634828
873	MPD	0.238652415	0.516482542
874	MID	0.444483741	0.352603607
875	MPID	0.170432404	0.33954732
876	MIPD	0.195414875	0.358146097
877	MPD	0.4848072	0.691727691
878	MID	0.556397255	0.390648426
879	MPID	0.229821334	0.288907028
880	MIPD	0.435973625	0.54680252
881	MPD	0.133347924	0.380231156
882	MID	0.116201027	0.415852322
883	MPID	0.089700584	0.313049983
884	MIPD	0.11970183	0.341355946
885	MPD	0.216497261	0.334951084
886	MID	0.34304353	0.483008538
887	MPID	0.309884109	0.378533431
888	MIPD	0.432817833	0.397434421
889	MPD	0.22081174	0.428605444
890	MID	0.301086487	0.519907053
891	MPID	0.118599083	0.569134788
892	MIPD	0.132069123	0.372102169
893	MPD	0.056502811	0.11856916
894	MID	0.192286178	0.149727633
895	MPID	0.057940227	0.103989205
896	MIPD	0.117098327	0.155795823
897	MPD	0.161791263	0.606966781
898	MID	0.072862311	0.461936013
899	MPID	0.151730387	0.456339571
900	MIPD	0.101185811	0.459649566
901	MPD	0.329598644	0.198771003
902	MID	0.563349568	0.192609411
903	MPID	0.318122939	0.274282953
904	MIPD	0.392583896	0.227936143
905	MPD	0.228841982	0.38675333
906	MID	0.092906979	0.085308597
907	MPID	0.114694802	0.12213787
908	MIPD	0.12226229	0.095248305
909	MPD	0.197217953	0.481423951
910	MID	0.491821961	0.716758793
911	MPID	0.2692038	0.658607698
912	MIPD	0.130257233	0.426310257
913	MPD	0.143450147	0.221308877
914	MID	0.613517051	0.265798604
915	MPID	0.213434629	0.216816137
916	MIPD	0.300356084	0.115037541
917	MPD	0.15561847	0.149911778
918	MID	0.089936899	0.128250398
919	MPID	0.095535081	0.1640329
920	MIPD	0.041053415	0.155452177
921	MPD	0.301755403	0.647412249
922	MID	0.220902775	0.561355633
923	MPID	0.21660202	0.617057136
924	MIPD	0.236608442	0.704693318
925	MPD	0.113209656	0.104572352
926	MID	0.410842998	0.170777072
927	MPID	0.293912211	0.152392767
928	MIPD	0.288614773	0.122793482
929	MPD	0.242678729	0.523384283
930	MID	0.115687888	0.454972885
931	MPID	0.118660939	0.529607537
932	MIPD	0.086369916	0.387949334
933	MPD	0.336338258	0.48640692
934	MID	0.299286883	0.14793903
935	MPID	0.143645028	0.113907691
936	MIPD	0.122444005	0.124599077
937	MPD	0.29011477	0.440956607
938	MID	0.139376428	0.306373979
939	MPID	0.099112643	0.317440596
940	MIPD	0.237862373	0.27520946
941	MPD	0.172149397	0.266752992
942	MID	0.092353148	0.168371495
943	MPID	0.160558071	0.207014422
944	MIPD	0.099983191	0.223073923
945	MPD	0.306843105	0.618989485
946	MID	0.159083284	0.32990326
947	MPID	0.113965827	0.312960588
948	MIPD	0.117419085	0.299560703
949	MPD	0.093880786	0.384751782
950	MID	0.062223123	0.355001052
951	MPID	0.19551386	0.36175731
952	MIPD	0.09630771	0.246298345
953	MPD	0.183867408	0.477277543
954	MID	0.078254471	0.195668614
955	MPID	0.0826346	0.23269622
956	MIPD	0.071596322	0.164821998
957	MPD	0.225617496	0.584014013
958	MID	0.21144466	0.690146742
959	MPID	0.323145459	0.580002077
960	MIPD	0.307026217	0.629074108
961	MPD	0.078972481	0.256312314
962	MID	0.125681729	0.450619398
963	MPID	0.127943055	0.342235427
964	MIPD	0.072296465	0.39272391
965	MPD	0.152144728	0.429170124
966	MID	0.086490774	0.510955531
967	MPID	0.039065754	0.284331007
968	MIPD	0.053461254	0.289162605
969	MPD	0.330504452	0.557574003
970	MID	0.520237058	0.419673708
971	MPID	0.300068074	0.487751775
972	MIPD	0.262014463	0.603041183
973	MPD	0.522300798	0.401989142
974	MID	0.235740508	0.152140072
975	MPID	0.230515271	0.177021223
976	MIPD	0.297104703	0.148007507
977	MPD	0.206474376	0.81551315
978	MID	0.282213887	0.90806542
979	MPID	0.413503768	0.881345534
980	MIPD	0.227862212	0.740455837
981	MPD	0.320790395	0.417400677
982	MID	0.159738209	0.205102278
983	MPID	0.281580463	0.12574578
984	MIPD	0.159213321	0.118793729
985	MPD	0.209873471	0.386349732
986	MID	0.098375359	0.101112986
987	MPID	0.162310899	0.193286191
988	MIPD	0.101844641	0.137265902
989	MPD	0.310996468	0.841929579
990	MID	0.301188172	0.29317769
991	MPID	0.152499698	0.584644347
992	MIPD	0.175859442	0.445626059
993	MPD	0.342793895	0.425195806
994	MID	0.315781797	0.170701969
995	MPID	0.405891519	0.296355814
996	MIPD	0.421410484	0.232439671
997	MPD	0.084976094	0.24348365
998	MID	0.098043436	0.454030928
999	MPID	0.071138814	0.305368767
1000	MIPD	0.070218044	0.346998266
1001	MPD	0.131213509	0.257986121
1002	MID	0.176429268	0.319872663
1003	MPID	0.118401579	0.350888188
1004	MIPD	0.196930035	0.267358226
1005	MPD	0.159467627	0.554434377
1006	MID	0.387915525	0.406351173
1007	MPID	0.129252355	0.459833965
1008	MIPD	0.18330968	0.414964333
1009	MPD	0.301708991	0.175865654
1010	MID	0.727258727	0.204571766
1011	MPID	0.434383597	0.178643483
1012	MIPD	0.368145797	0.232706771
1013	MPD	0.568691237	0.829888837
1014	MID	0.667680635	0.595120868
1015	MPID	0.28798966	0.485841746
1016	MIPD	0.5278788	0.594552133
1017	MPD	0.165613196	0.307609199
1018	MID	0.110934557	0.276583786
1019	MPID	0.219793245	0.267667816
1020	MIPD	0.23095724	0.369629031
1021	MPD	0.083011574	0.192662997
1022	MID	0.103790717	0.398543476
1023	MPID	0.159846989	0.127935997
1024	MIPD	0.065684614	0.341646406
1025	MPD	0.535033894	0.461350872
1026	MID	0.760457517	0.462456481
1027	MPID	0.777267414	0.436572701
1028	MIPD	0.835806466	0.520768188
1029	MPD	0.173730292	0.322786755
1030	MID	0.113032616	0.378944553
1031	MPID	0.153897355	0.32322744
1032	MIPD	0.132113042	0.275660199
1033	MPD	0.297685387	0.479378242
1034	MID	0.244816836	0.150181709
1035	MPID	0.157576245	0.161752658
1036	MIPD	0.296959226	0.127419312
1037	MPD	0.266543596	0.373933328
1038	MID	0.35657634	0.162612142
1039	MPID	0.206453655	0.226125964
1040	MIPD	0.216491181	0.179829099
1041	MPD	0.209802723	0.389106782
1042	MID	1.083952581	0.301336417
1043	MPID	0.293065822	0.264688687
1044	MIPD	0.375589921	0.303083236
1045	MPD	0.301578039	0.386468274
1046	MID	0.448521081	0.241898271
1047	MPID	0.341002088	0.329875729
1048	MIPD	0.30754514	0.216317845
1049	MPD	0.091666219	0.416838015
1050	MID	0.443735836	0.389369858
1051	MPID	0.095791152	0.271553721
1052	MIPD	0.135091368	0.343422375
1053	MPD	0.216885035	0.534431439
1054	MID	0.332356338	0.282418918
1055	MPID	0.254974217	0.371172017
1056	MIPD	0.317533216	0.23231488
1057	MPD	0.097752615	0.216452925
1058	MID	0.15295586	0.192399288
1059	MPID	0.1228275	0.241823721
1060	MIPD	0.077062926	0.170209909
1061	MPD	0.049647073	0.18992446
1062	MID	0.268811592	0.18266141
1063	MPID	0.107875575	0.112524824
1064	MIPD	0.120151749	0.166125501
1065	MPD	0.099263533	0.251732562
1066	MID	0.137182606	0.325084899
1067	MPID	0.056341331	0.319188947
1068	MIPD	0.131933174	0.341200158
1069	MPD	0.402992647	0.520290434
1070	MID	0.150955021	0.474797217
1071	MPID	0.182179234	0.273911773
1072	MIPD	0.207651384	0.44619665
1073	MPD	0.232669938	0.236116572
1074	MID	0.153512298	0.229901777
1075	MPID	0.296296036	0.258591609
1076	MIPD	0.130050777	0.27298734
1077	MPD	0.062267809	0.17696959
1078	MID	0.160461263	0.314715296
1079	MPID	0.235562698	0.393814012
1080	MIPD	0.110746434	0.27790016
1081	MPD	0.257502247	0.931656585
1082	MID	0.206591057	0.448007984
1083	MPID	0.202241462	0.378324756
1084	MIPD	0.18634583	0.345972756
1085	MPD	0.228841291	0.404449878
1086	MID	0.194515813	0.318774102
1087	MPID	0.186550624	0.26999747
1088	MIPD	0.137521339	0.166599142
1089	MPD	0.277845185	0.505784769
1090	MID	0.170944549	0.491227293
1091	MPID	0.2056822	0.430824689
1092	MIPD	0.21550262	0.43586354
1093	MPD	0.125420446	0.207832553
1094	MID	0.149752656	0.161464506
1095	MPID	0.248352064	0.263610057
1096	MIPD	0.253985395	0.178290524
1097	MPD	0.076475445	0.184501237
1098	MID	0.061959679	0.252712555
1099	MPID	0.058785308	0.233046737
1100	MIPD	0.152320398	0.309781066
1101	MPD	0.488087366	0.299485184
1102	MID	0.658026323	0.425889654
1103	MPID	0.460084901	0.477033584
1104	MIPD	0.595649895	0.2592055
1105	MPD	0.252360524	0.418481133
1106	MID	0.306178149	0.253899463
1107	MPID	0.153069121	0.252581443
1108	MIPD	0.144682601	0.248623391
1109	MPD	0.434863388	0.716275498
1110	MID	0.454710624	0.310343049
1111	MPID	0.228666246	0.381998191
1112	MIPD	0.283432471	0.420767951
1113	MPD	0.073060895	0.281715252
1114	MID	0.0796607	0.348080612
1115	MPID	0.09501206	0.318239692
1116	MIPD	0.051009097	0.277267426
1117	MPD	0.084727825	0.245122083
1118	MID	0.193329304	0.439596345
1119	MPID	0.094807545	0.320013358
1120	MIPD	0.090723785	0.389100693
1121	MPD	0.207048215	0.490733375
1122	MID	0.292144129	0.338485929
1123	MPID	0.043619635	0.399355298
1124	MIPD	0.12603614	0.462467647
1125	MPD	0.496168658	0.523020586
1126	MID	0.315403566	0.243245549
1127	MPID	0.323666185	0.568719731
1128	MIPD	0.19251397	0.382752809
1129	MPD	0.496524149	0.560283036
1130	MID	0.417506906	0.50638131
1131	MPID	0.399854989	0.568427243
1132	MIPD	0.257383404	0.422824538
1133	MPD	0.153241704	0.197387805
1134	MID	0.039568342	0.141498818
1135	MPID	0.141972192	0.225862387
1136	MIPD	0.116198904	0.172667782
1137	MPD	0.249847292	0.213008574
1138	MID	0.417653162	0.112850344
1139	MPID	0.286659349	0.111389928
1140	MIPD	0.351475591	0.156631631
1141	MPD	0.557388038	0.721067022
1142	MID	1.091942785	0.215880895
1143	MPID	0.428507157	0.439288034
1144	MIPD	0.661184382	0.175571971
1145	MPD	0.402075424	0.277751984
1146	MID	0.318061331	0.256555306
1147	MPID	0.392620892	0.374585754
1148	MIPD	0.344105342	0.255168897
1149	MPD	0.348733957	0.410666734
1150	MID	0.085619195	0.123379311
1151	MPID	0.163864662	0.168614474
1152	MIPD	0.220207555	0.182286778
1153	MPD	0.256510985	0.455738883
1154	MID	0.259189606	0.400461323
1155	MPID	0.127813488	0.204139989
1156	MIPD	0.064418446	0.322363787
1157	MPD	0.157720839	0.18247087
1158	MID	0.397108773	0.179034981
1159	MPID	0.283363144	0.164620135
1160	MIPD	0.299114192	0.144670448
1161	MPD	0.186965492	0.225513522
1162	MID	0.132748229	0.190869325
1163	MPID	0.11902129	0.15414313
1164	MIPD	0.068578122	0.155578744
1165	MPD	0.194431759	0.8220563
1166	MID	0.435942669	0.671130783
1167	MPID	0.239592531	0.695573582
1168	MIPD	0.131911968	0.682318728
1169	MPD	0.33848816	0.750976708
1170	MID	1.204085576	0.567471026
1171	MPID	0.265782294	0.495315164
1172	MIPD	0.414393924	0.575691831
1173	MPD	0.258312266	0.332602898
1174	MID	0.141594631	0.240102972
1175	MPID	0.114713601	0.152680912
1176	MIPD	0.086100364	0.110227858
1177	MPD	0.23313863	0.322036371
1178	MID	0.365974507	0.253783098
1179	MPID	0.294422819	0.348688835
1180	MIPD	0.341326438	0.342547756
1181	MPD	0.074898972	0.096908992
1182	MID	0.093363378	0.188968422
1183	MPID	0.035395823	0.18688184
1184	MIPD	0.069829075	0.125314346
1185	MPD	0.288477784	0.403822477
1186	MID	0.36718263	0.262372446
1187	MPID	0.294868792	0.267775679
1188	MIPD	0.411254126	0.276456694
1189	MPD	0.083064732	0.146671732
1190	MID	0.166683208	0.302604591
1191	MPID	0.158552065	0.241835787
1192	MIPD	0.168892316	0.216219168
1193	MPD	0.317038891	0.613138294
1194	MID	0.107023431	0.495090381
1195	MPID	0.134054269	0.434123982
1196	MIPD	0.193890497	0.586827482
1197	MPD	0.162089358	0.489963091
1198	MID	0.182415278	0.526521071
1199	MPID	0.257039645	0.565503663
1200	MIPD	0.183638692	0.565117926
1201	MPD	0.070208464	0.326824139
1202	MID	0.304249458	0.369392291
1203	MPID	0.113142186	0.413942918
1204	MIPD	0.221169441	0.293316657
1205	MPD	0.483234488	0.368992243
1206	MID	0.736180315	0.191791926
1207	MPID	0.477772719	0.231041246
1208	MIPD	0.470469383	0.123589668
1209	MPD	0.24952384	0.456151823
1210	MID	0.428991073	0.178861403
1211	MPID	0.228724972	0.392361263
1212	MIPD	0.207343686	0.24492849
1213	MPD	0.391552626	0.337861004
1214	MID	0.893650312	0.42107599
1215	MPID	0.577682064	0.331092666
1216	MIPD	0.644085801	0.300012125
1217	MPD	0.106773357	0.321537083
1218	MID	0.071796002	0.297546586
1219	MPID	0.086657489	0.233175548
1220	MIPD	0.053825354	0.256212489
1221	MPD	0.374497557	0.943624497
1222	MID	0.39525867	1.191842574
1223	MPID	0.305488052	0.992576914
1224	MIPD	0.248092096	0.889767186
1225	MPD	0.214935431	0.41178904
1226	MID	0.195419947	0.142221831
1227	MPID	0.091117972	0.203549573
1228	MIPD	0.120508373	0.133453189
1229	MPD	0.118853862	0.47527701
1230	MID	0.060432727	0.495228391
1231	MPID	0.163313032	0.528263603
1232	MIPD	0.091313709	0.433177275
1233	MPD	0.314577996	0.691853016
1234	MID	0.622658474	0.325363008
1235	MPID	0.384803013	0.240449975
1236	MIPD	0.34428032	0.220312662
1237	MPD	0.095931215	0.241560877
1238	MID	0.28239008	0.282278306
1239	MPID	0.165904251	0.228175913
1240	MIPD	0.074343163	0.20089971
1241	MPD	0.171706534	0.247558568
1242	MID	0.153115922	0.177188209
1243	MPID	0.057768404	0.116064177
1244	MIPD	0.117038258	0.125401394
1245	MPD	0.391081599	0.751248613
1246	MID	0.359383903	0.431524782
1247	MPID	0.288501808	0.349601036
1248	MIPD	0.353349884	0.518098821
1249	MPD	0.376117978	0.71712278
1250	MID	0.237118497	0.568871193
1251	MPID	0.271599084	0.692596258
1252	MIPD	0.292506586	0.615144578
1253	MPD	0.42069898	0.384849964
1254	MID	0.189698968	0.187278742
1255	MPID	0.153791269	0.193987834
1256	MIPD	0.090488199	0.14110223
1257	MPD	0.341521887	0.261775578
1258	MID	1.661701132	0.246496721
1259	MPID	0.392497641	0.262884296
1260	MIPD	0.436030338	0.211287747
1261	MPD	0.107029509	0.188108612
1262	MID	0.098082199	0.194134561
1263	MPID	0.130853799	0.137123354
1264	MIPD	0.154472044	0.112076249
1265	MPD	0.143735988	0.400103992
1266	MID	0.084708488	0.311037516
1267	MPID	0.099540771	0.337901358
1268	MIPD	0.274565429	0.323268979
1269	MPD	0.297020224	0.217348125
1270	MID	0.548003397	0.286340063
1271	MPID	0.154251931	0.301582744
1272	MIPD	0.102859635	0.250267605
1273	MPD	0.225974138	0.375785805
1274	MID	0.530198072	0.152316556
1275	MPID	0.34381776	0.228697386
1276	MIPD	0.153931821	0.112646846
1277	MPD	0.294010127	0.254919919
1278	MID	0.225661272	0.402023965
1279	MPID	0.196444386	0.267566393
1280	MIPD	0.195796744	0.35265218
1281	MPD	0.212340326	0.308359557
1282	MID	0.42660256	0.281971841
1283	MPID	0.257164605	0.24506744
1284	MIPD	0.18404657	0.223781126
1285	MPD	0.086235695	0.354195641
1286	MID	0.375060882	0.207371569
1287	MPID	0.051544295	0.228402965
1288	MIPD	0.079163167	0.317324973
1289	MPD	0.114524485	0.194038428
1290	MID	0.277519051	0.199298022
1291	MPID	0.057025035	0.154406367
1292	MIPD	0.224834076	0.16907104
1293	MPD	0.176577562	0.403663419
1294	MID	0.159512143	0.486429782
1295	MPID	0.048100517	0.44230976
1296	MIPD	0.048500365	0.353885775
1297	MPD	0.303785553	0.31541395
1298	MID	0.147980409	0.166284842
1299	MPID	0.223513909	0.198527798
1300	MIPD	0.317295921	0.157007154
1301	MPD	0.197359163	0.410625666
1302	MID	0.264143297	0.294533333
1303	MPID	0.214585842	0.390454325
1304	MIPD	0.088819565	0.231437444
1305	MPD	0.07939726	0.644201727
1306	MID	0.218681018	0.848628969
1307	MPID	0.156668583	0.750310316
1308	MIPD	0.193001969	0.775949846
1309	MPD	0.424891702	0.646959066
1310	MID	0.12898738	0.370214909
1311	MPID	0.324013671	0.46608491
1312	MIPD	0.278633855	0.360411601
1313	MPD	0.176730481	1.146895556
1314	MID	0.148870203	1.078820408
1315	MPID	0.118169617	0.920232278
1316	MIPD	0.123073095	1.018237465
1317	MPD	0.161006957	0.622198258
1318	MID	0.343567297	0.536371114
1319	MPID	0.212305545	0.497645195
1320	MIPD	0.162256507	0.427546358
1321	MPD	0.079358303	0.360555802
1322	MID	0.028983445	0.283862412
1323	MPID	0.095991214	0.26699868
1324	MIPD	0.116821356	0.416401854
1325	MPD	0.458598246	0.341917111
1326	MID	0.233583202	0.145294403
1327	MPID	0.424069145	0.145799673
1328	MIPD	0.334734948	0.153232523
1329	MPD	0.111271533	0.229009933
1330	MID	0.331518539	0.334181589
1331	MPID	0.131439701	0.229307091
1332	MIPD	0.265164217	0.362066555
1333	MPD	0.193738283	1.070690693
1334	MID	0.24450268	0.734363834
1335	MPID	0.124672944	0.853537917
1336	MIPD	0.174201603	0.830559387
1337	MPD	0.552233224	0.478377723
1338	MID	0.862679434	0.270905468
1339	MPID	0.477215221	0.280807979
1340	MIPD	0.423136388	0.248160179
1341	MPD	0.111808818	0.135018431
1342	MID	0.057876238	0.158242396
1343	MPID	0.049127834	0.14460484
1344	MIPD	0.127323944	0.196613247
1345	MPD	0.184840111	0.547861043
1346	MID	0.117811522	0.369148037
1347	MPID	0.137300059	0.33614286
1348	MIPD	0.067670536	0.355951805
1349	MPD	0.111223242	0.388308685
1350	MID	0.163324572	0.281675718
1351	MPID	0.109102511	0.229576598
1352	MIPD	0.126704541	0.17984105
1353	MPD	0.081432957	0.942071059
1354	MID	0.25184408	1.051198397
1355	MPID	0.109282104	1.071031325
1356	MIPD	0.231195889	0.873497046
1357	MPD	0.098530945	0.25053436
1358	MID	0.271346912	0.293157077
1359	MPID	0.137722856	0.253966641
1360	MIPD	0.144361379	0.276287595
1361	MPD	0.093262516	0.166432944
1362	MID	0.111902848	0.320390394
1363	MPID	0.22295955	0.260856308
1364	MIPD	0.108538584	0.155985514
1365	MPD	0.169154793	0.255540606
1366	MID	0.085295144	0.148863999
1367	MPID	0.268987289	0.175630322
1368	MIPD	0.125848036	0.132875129
1369	MPD	0.261866869	0.23999936
1370	MID	0.155442508	0.171187885
1371	MPID	0.080661766	0.110622312
1372	MIPD	0.235348893	0.141460477
1373	MPD	0.223739935	0.3781451
1374	MID	0.368436618	0.184197243
1375	MPID	0.157799567	0.145988118
1376	MIPD	0.134877203	0.180951503
1377	MPD	0.192623404	0.219544389
1378	MID	0.190798558	0.160479008
1379	MPID	0.151751464	0.19102548
1380	MIPD	0.250007247	0.317290389
1381	MPD	0.265749626	0.431251673
1382	MID	0.203914554	0.373527056
1383	MPID	0.130650959	0.25557184
1384	MIPD	0.28747963	0.374124915
1385	MPD	0.115158092	0.250178354
1386	MID	0.114576142	0.249500514
1387	MPID	0.129748259	0.232386681
1388	MIPD	0.027310037	0.202529451
1389	MPD	0.065723836	0.25414366
1390	MID	0.179457544	0.288714095
1391	MPID	0.219389692	0.262701933
1392	MIPD	0.113258619	0.20673845
1393	MPD	0.235056577	0.59103983
1394	MID	0.278639911	0.360910519
1395	MPID	0.210707654	0.441479799
1396	MIPD	0.184627495	0.476288674
1397	MPD	0.274472456	0.306708101
1398	MID	0.140392105	0.460624582
1399	MPID	0.531425411	0.435618778
1400	MIPD	0.295591085	0.361876132
1401	MPD	0.291120567	0.424591681
1402	MID	0.525445336	0.337400583
1403	MPID	0.375376405	0.39163747
1404	MIPD	0.431231093	0.345694469
1405	MPD	0.223038068	0.307655583
1406	MID	0.29281149	0.214177764
1407	MPID	0.153101918	0.180439714
1408	MIPD	0.188806336	0.242947878
1409	MPD	0.277794756	0.298415166
1410	MID	0.562380942	0.215730372
1411	MPID	0.444154337	0.195808358
1412	MIPD	0.299864886	0.215231387
1413	MPD	0.308296099	0.402501767
1414	MID	0.371166582	0.271310182
1415	MPID	0.280701692	0.312444095
1416	MIPD	0.287593276	0.270180533
1417	MPD	0.388636995	0.491152143
1418	MID	0.287634914	0.596209453
1419	MPID	0.452197693	0.536866674
1420	MIPD	0.471923447	0.539082288
1421	MPD	0.085427514	0.337753656
1422	MID	0.310240226	0.303520387
1423	MPID	0.164243404	0.304802819
1424	MIPD	0.162202278	0.296585973
1425	MPD	0.153399521	0.324163208
1426	MID	0.127727611	0.295917818
1427	MPID	0.07515867	0.296522315
1428	MIPD	0.139093631	0.311422616
1429	MPD	0.293949135	0.799232847
1430	MID	0.128445307	0.575513887
1431	MPID	0.302178005	0.649976363
1432	MIPD	0.28714949	0.616169935
1433	MPD	0.130721215	0.213932707
1434	MID	0.446691014	0.226669641
1435	MPID	0.189566847	0.22069083
1436	MIPD	0.316380111	0.305821293
1437	MPD	0.19615228	0.341478582
1438	MID	0.105155769	0.230505211
1439	MPID	0.075905771	0.169051036
1440	MIPD	0.207563742	0.208655657
1441	MPD	0.236430707	0.282849025
1442	MID	0.255756823	0.250131062
1443	MPID	0.165787847	0.190404724
1444	MIPD	0.126815762	0.225252835
1445	MPD	0.096800099	0.130696899
1446	MID	0.060034587	0.107277251
1447	MPID	0.070615613	0.169410012
1448	MIPD	0.127873262	0.164663775
1449	MPD	0.44489587	0.45450216
1450	MID	0.395352932	0.111660457
1451	MPID	0.261509755	0.163275451
1452	MIPD	0.31125844	0.125024726
1453	MPD	0.127902327	0.376125907
1454	MID	0.377937743	0.321880557
1455	MPID	0.246627712	0.191735179
1456	MIPD	0.339192552	0.262317168
1457	MPD	0.28305622	0.458352612
1458	MID	0.136664046	0.322643957
1459	MPID	0.25621146	0.204711433
1460	MIPD	0.134201434	0.239606355
1461	MPD	0.278057761	0.591286079
1462	MID	0.190472505	0.194224861
1463	MPID	0.082231909	0.273642131
1464	MIPD	0.131085632	0.320668498
1465	MPD	0.128284507	0.221042484
1466	MID	0.231813458	0.149025195
1467	MPID	0.203505969	0.118003723
1468	MIPD	0.22101354	0.172093824
1469	MPD	0.201913149	0.321494439
1470	MID	0.157157213	0.169415888
1471	MPID	0.118993622	0.271160274
1472	MIPD	0.131579939	0.131215391
1473	MPD	0.084923032	0.294177074
1474	MID	0.247228264	0.495850724
1475	MPID	0.073209936	0.441196772
1476	MIPD	0.047120796	0.47656565
1477	MPD	0.054258487	0.076263091
1478	MID	0.186347582	0.058313867
1479	MPID	0.176310406	0.09255138
1480	MIPD	0.061428345	0.042646545
1481	MPD	0.206807635	0.221697011
1482	MID	0.185931129	0.283007213
1483	MPID	0.118573275	0.326651989
1484	MIPD	0.217556256	0.271542268
1485	MPD	0.10175167	0.216059397
1486	MID	0.568139522	0.183419938
1487	MPID	0.248995497	0.145733336
1488	MIPD	0.353648296	0.122975308
1489	MPD	0.151059576	0.210363956
1490	MID	0.189642776	0.153840569
1491	MPID	0.132604514	0.137714478
1492	MIPD	0.235507798	0.141418258
1493	MPD	0.291353803	0.203162644
1494	MID	0.415842291	0.33579562
1495	MPID	0.427820307	0.244260416
1496	MIPD	0.420440691	0.241209883
1497	MPD	0.088167818	0.259394513
1498	MID	0.088316142	0.275030864
1499	MPID	0.19465725	0.280817959
1500	MIPD	0.149272197	0.217030192
1501	MPD	0.214556631	0.787669587
1502	MID	0.208266436	0.736403103
1503	MPID	0.109710122	0.756448577
1504	MIPD	0.139934727	0.711337766
1505	MPD	0.095568575	0.315688847
1506	MID	0.121954625	0.3525039
1507	MPID	0.055580857	0.238027231
1508	MIPD	0.067369257	0.240285545
1509	MPD	0.103307741	0.177651299
1510	MID	0.162230813	0.352205562
1511	MPID	0.045837871	0.259045217
1512	MIPD	0.069594138	0.230682202
1513	MPD	0.412871868	0.813413624
1514	MID	0.274586485	0.967053917
1515	MPID	0.394605905	0.606402926
1516	MIPD	0.356985679	0.61432653
1517	MPD	0.132609311	0.42614286
1518	MID	0.367992683	0.513675598
1519	MPID	0.155331183	0.430336346
1520	MIPD	0.25282278	0.615676859
1521	MPD	0.098272501	0.279713685
1522	MID	0.339465129	0.21503187
1523	MPID	0.207138527	0.29428828
1524	MIPD	0.104800638	0.288032044
1525	MPD	0.202273187	0.197526447
1526	MID	0.755756894	0.17621231
1527	MPID	0.133439125	0.177011131
1528	MIPD	0.676236949	0.136088806
1529	MPD	0.192423006	0.300297115
1530	MID	0.372012794	0.158354548
1531	MPID	0.079578818	0.200155209
1532	MIPD	0.124590218	0.106956193
1533	MPD	0.594493458	0.686394869
1534	MID	0.294524243	0.361686584
1535	MPID	0.221740364	0.49152799
1536	MIPD	0.328988563	0.32529739
1537	MPD	0.08170554	0.228619036
1538	MID	0.070795466	0.269850157
1539	MPID	0.075248207	0.216084327
1540	MIPD	0.043578047	0.165533054
1541	MPD	0.237656161	0.394839958
1542	MID	0.353236541	0.375239274
1543	MPID	0.284861902	0.456818374
1544	MIPD	0.43598148	0.394812818
1545	MPD	0.141395265	0.719642656
1546	MID	0.150043832	0.571116125
1547	MPID	0.128781354	0.69518967
1548	MIPD	0.224976459	0.523240828
1549	MPD	0.217809229	0.282223
1550	MID	0.38732313	0.292900398
1551	MPID	0.089869351	0.129028659
1552	MIPD	0.099646585	0.16784124
1553	MPD	0.07426641	0.245151426
1554	MID	0.132172936	0.243078961
1555	MPID	0.114180555	0.328141164
1556	MIPD	0.168610046	0.325852837
1557	MPD	0.31418053	0.386978577
1558	MID	0.109620395	0.21712657
1559	MPID	0.163756293	0.283531056
1560	MIPD	0.159169672	0.207156047
1561	MPD	0.200605823	0.332268524
1562	MID	0.322886973	0.412589071
1563	MPID	0.253788987	0.456434131
1564	MIPD	0.282340965	0.314872461
1565	MPD	0.615988874	0.530550763
1566	MID	0.742118481	0.270284781
1567	MPID	0.747605	0.310370503
1568	MIPD	0.692351648	0.269782294
1569	MPD	0.268864344	0.358827791
1570	MID	0.425112106	0.199732968
1571	MPID	0.260726137	0.186020892
1572	MIPD	0.204286661	0.188664065
1573	MPD	0.129255529	0.613254716
1574	MID	0.35636047	0.869759364
1575	MPID	0.197818411	0.567091475
1576	MIPD	0.276753967	0.668530057
1577	MPD	0.24924295	0.247999575
1578	MID	0.389089547	0.162746463
1579	MPID	0.308075056	0.134769844
1580	MIPD	0.440683036	0.130114241
1581	MPD	0.23048265	0.285323995
1582	MID	0.190701705	0.141001341
1583	MPID	0.227716015	0.141303853
1584	MIPD	0.155035044	0.151239413
1585	MPD	0.574667178	0.75253327
1586	MID	0.203992755	0.367455747
1587	MPID	0.291794337	0.367296609
1588	MIPD	0.301392017	0.418251897
1589	MPD	0.084382453	0.161812069
1590	MID	0.28721288	0.291039035
1591	MPID	0.158140946	0.243252109
1592	MIPD	0.131027281	0.166465494
1593	MPD	0.400620779	0.487570252
1594	MID	1.305935341	0.534034874
1595	MPID	0.455183255	0.34961614
1596	MIPD	0.225803103	0.374340859
1597	MPD	0.109430806	0.533918006
1598	MID	0.168974112	0.575437319
1599	MPID	0.208276761	0.594556089
1600	MIPD	0.288081573	0.596638216
1601	MPD	0.236639066	0.458204037
1602	MID	0.175892902	0.233451859
1603	MPID	0.081416781	0.153849314
1604	MIPD	0.054892497	0.210235423
1605	MPD	0.128098968	0.5435537
1606	MID	0.138500852	0.585531554
1607	MPID	0.275953254	0.409063034
1608	MIPD	0.14852268	0.53690016
1609	MPD	0.310140152	0.463538911
1610	MID	0.26755585	0.326199562
1611	MPID	0.248611431	0.381317736
1612	MIPD	0.324675438	0.338586494
1613	MPD	0.13226661	0.268821359
1614	MID	0.286783375	0.268463946
1615	MPID	0.101840085	0.24195502
1616	MIPD	0.156238698	0.168916341
1617	MPD	0.190644529	0.260626351
1618	MID	0.345124966	0.352088774
1619	MPID	0.194814635	0.345559492
1620	MIPD	0.25994525	0.275960169
1621	MPD	0.273266004	0.46601795
1622	MID	0.50684124	0.354201552
1623	MPID	0.327538759	0.289376026
1624	MIPD	0.49023663	0.380504977
1625	MPD	0.343240326	0.230642812
1626	MID	0.155990637	0.12314255
1627	MPID	0.300459081	0.179310857
1628	MIPD	0.17893018	0.159522479
1629	MPD	0.260963957	0.211430581
1630	MID	0.270818972	0.368497322
1631	MPID	0.224622211	0.266710959
1632	MIPD	0.288302437	0.282703951
1633	MPD	0.153294395	0.209572366
1634	MID	0.15158344	0.251585494
1635	MPID	0.143437602	0.30848125
1636	MIPD	0.071790536	0.247759872
1637	MPD	0.171441982	0.228081797
1638	MID	0.200277317	0.189665867
1639	MPID	0.206974321	0.23508534
1640	MIPD	0.093586863	0.201618533
1641	MPD	0.238243214	0.324767113
1642	MID	0.200512479	0.168024504
1643	MPID	0.087860497	0.161007465
1644	MIPD	0.076892355	0.189663648
1645	MPD	0.161181095	0.213069421
1646	MID	0.173582178	0.275492783
1647	MPID	0.225225615	0.181831841
1648	MIPD	0.194491536	0.222344046
1649	MPD	0.410572686	0.269257208
1650	MID	0.48185037	0.120002175
1651	MPID	0.540372557	0.156940806
1652	MIPD	0.325583722	0.174502145
1653	MPD	0.725182106	0.6381428
1654	MID	0.495219558	0.151014901
1655	MPID	0.563079865	0.137330366
1656	MIPD	0.432394347	0.235969126
1657	MPD	0.169815686	0.850172899
1658	MID	0.059976863	0.811167242
1659	MPID	0.176803577	0.916515577
1660	MIPD	0.134135491	0.967307265
1661	MPD	0.067037747	0.161389275
1662	MID	0.157814713	0.130042842
1663	MPID	0.045999501	0.150290486
1664	MIPD	0.080999212	0.063754202
1665	MPD	0.080781497	0.373144857
1666	MID	0.12034424	0.29782377
1667	MPID	0.064522507	0.200672365
1668	MIPD	0.18594717	0.292573454
1669	MPD	0.386058626	0.281015839
1670	MID	0.323035299	0.1312234
1671	MPID	0.378739667	0.138670745
1672	MIPD	0.260186347	0.159850831
1673	MPD	0.087902894	0.346784283
1674	MID	0.157218374	0.364917004
1675	MPID	0.254989227	0.394637483
1676	MIPD	0.117880898	0.336171178
1677	MPD	0.188690685	0.370862043
1678	MID	0.057572009	0.392292303
1679	MPID	0.119811043	0.549975517
1680	MIPD	0.145823868	0.4540398
1681	MPD	0.218125512	0.28092936
1682	MID	0.264459337	0.327948351
1683	MPID	0.221684371	0.259371972
1684	MIPD	0.164623129	0.257075518
1685	MPD	0.357778759	0.265126133
1686	MID	0.154931034	0.336914404
1687	MPID	0.243072572	0.271468472
1688	MIPD	0.343204398	0.277313068
1689	MPD	0.143449067	0.676805781
1690	MID	0.119295315	0.618464661
1691	MPID	0.249621725	0.510005786
1692	MIPD	0.159255316	0.55181905
1693	MPD	0.109400261	0.516177801
1694	MID	0.294113427	0.382781867
1695	MPID	0.246024019	0.571025637
1696	MIPD	0.094073055	0.344349038
1697	MPD	0.243638626	0.315553971
1698	MID	0.250124674	0.309805729
1699	MPID	0.181211237	0.295659551
1700	MIPD	0.244974715	0.266572605
1701	MPD	0.296255051	0.515316552
1702	MID	0.097430302	0.432472962
1703	MPID	0.105173779	0.242038256
1704	MIPD	0.248343583	0.29398219
1705	MPD	0.216740987	0.505054582
1706	MID	0.541251413	0.497301391
1707	MPID	0.22890094	0.517649423
1708	MIPD	0.218413249	0.452448296
1709	MPD	0.149826583	0.424405923
1710	MID	0.182598568	0.448527358
1711	MPID	0.357324035	0.319767545
1712	MIPD	0.095929671	0.318180525
1713	MPD	0.23813661	0.684435343
1714	MID	0.259732912	0.589933112
1715	MPID	0.167118431	0.556600212
1716	MIPD	0.14616754	0.57190295
1717	MPD	0.068790273	0.102858566
1718	MID	0.254496144	0.148730277
1719	MPID	0.118595944	0.192596308
1720	MIPD	0.052199462	0.097421942
1721	MPD	0.422601214	0.315203681
1722	MID	0.254061697	0.202102881
1723	MPID	0.185834517	0.141563043
1724	MIPD	0.277372411	0.267780531
1725	MPD	0.15750104	0.365850541
1726	MID	0.250072379	0.347085978
1727	MPID	0.231811548	0.296860444
1728	MIPD	0.1596257	0.411141625
1729	MPD	0.071334395	0.209971343
1730	MID	0.168235374	0.126585462
1731	MPID	0.293980349	0.102970107
1732	MIPD	0.141841117	0.064222895
1733	MPD	0.123085854	0.389839992
1734	MID	0.151301725	0.5043862
1735	MPID	0.095728271	0.527592043
1736	MIPD	0.064805152	0.344895931
1737	MPD	0.037343939	0.282903575
1738	MID	0.153369812	0.605821416
1739	MPID	0.076884784	0.459477073
1740	MIPD	0.05760212	0.34924042
1741	MPD	0.680519361	0.694288125
1742	MID	0.135928417	0.230892362
1743	MPID	0.152508373	0.2682502
1744	MIPD	0.171309527	0.188664696
1745	MPD	0.206477809	0.511892414
1746	MID	0.245093161	0.55838273
1747	MPID	0.117617483	0.440601104
1748	MIPD	0.276432609	0.473382614
1749	MPD	0.171751752	0.191216885
1750	MID	0.2226496	0.299151061
1751	MPID	0.091368275	0.224234726
1752	MIPD	0.166231749	0.208896482
1753	MPD	0.193470196	0.335655448
1754	MID	0.140612466	0.319259636
1755	MPID	0.141162016	0.252440739
1756	MIPD	0.118646236	0.28414944
1757	MPD	0.226456582	0.789955005
1758	MID	0.160634761	0.573622694
1759	MPID	0.088477124	0.58238723
1760	MIPD	0.366195519	0.620220389
1761	MPD	0.114271424	0.408068879
1762	MID	0.123844493	0.317808864
1763	MPID	0.082934602	0.310151178
1764	MIPD	0.106803965	0.372365185
1765	MPD	0.094982607	0.331595017
1766	MID	0.769382073	0.382536223
1767	MPID	0.285720006	0.270338601
1768	MIPD	0.247569889	0.244993642
1769	MPD	0.415306827	0.295013292
1770	MID	0.530720204	0.306362398
1771	MPID	0.353070781	0.254573791
1772	MIPD	0.328625114	0.322147887
1773	MPD	0.546275845	0.987499053
1774	MID	0.179400972	0.563070435
1775	MPID	0.373921983	0.586727082
1776	MIPD	0.432287689	0.601677117
1777	MPD	0.076638886	0.138764051
1778	MID	0.27018918	0.325077199
1779	MPID	0.115033597	0.18318756
1780	MIPD	0.066727217	0.170619486
1781	MPD	0.221645671	0.326872599
1782	MID	0.309988533	0.324861767
1783	MPID	0.147772657	0.242529629
1784	MIPD	0.177345647	0.313858615
1785	MPD	0.120110136	0.763624014
1786	MID	0.310076911	0.687378178
1787	MPID	0.25648373	0.646885525
1788	MIPD	0.300596489	0.699173676
1789	MPD	0.158134649	0.327766399
1790	MID	0.203415279	0.347875543
1791	MPID	0.255150968	0.317645246
1792	MIPD	0.098617126	0.23260548
1793	MPD	0.185276766	0.223383984
1794	MID	0.445577822	0.224492253
1795	MPID	0.423646601	0.212743683
1796	MIPD	0.339329803	0.172544711
1797	MPD	0.159395022	0.200885119
1798	MID	0.293235964	0.174104896
1799	MPID	0.214925148	0.062133107
1800	MIPD	0.207477822	0.181600335
1801	MPD	0.128912209	0.446469769
1802	MID	0.180317858	0.575895041
1803	MPID	0.138044437	0.436268078
1804	MIPD	0.112580275	0.484977398
1805	MPD	0.1070338	0.155002669
1806	MID	0.067191117	0.16928019
1807	MPID	0.124107841	0.29592479
1808	MIPD	0.22086758	0.15020324
1809	MPD	0.122872873	0.323611358
1810	MID	0.058974285	0.199639605
1811	MPID	0.140858881	0.108611864
1812	MIPD	0.047815175	0.140817044
1813	MPD	0.119204502	0.427595736
1814	MID	0.142418995	0.29293547
1815	MPID	0.080179793	0.360065857
1816	MIPD	0.056293933	0.285719956
1817	MPD	0.159002962	0.380725674
1818	MID	0.208965984	0.341085478
1819	MPID	0.073641071	0.421684316
1820	MIPD	0.099083098	0.344777257
1821	MPD	0.237292893	0.220218243
1822	MID	0.948807436	0.191722038
1823	MPID	0.22670362	0.113876184
1824	MIPD	0.198091143	0.175227179
1825	MPD	0.063661926	0.474003168
1826	MID	0.088216374	0.672510596
1827	MPID	0.091528793	0.538002856
1828	MIPD	0.081825772	0.644392685
1829	MPD	0.275243824	0.235663803
1830	MID	0.169306869	0.16826445
1831	MPID	0.192457676	0.137993914
1832	MIPD	0.17013582	0.21428958
1833	MPD	0.381985131	0.366009056
1834	MID	0.217227134	0.186152285
1835	MPID	0.287632443	0.137494889
1836	MIPD	0.166945127	0.164155356
1837	MPD	0.145055718	0.093932939
1838	MID	0.301145693	0.243840443
1839	MPID	0.200190519	0.091820281
1840	MIPD	0.16020331	0.153244441
1841	MPD	0.348635501	0.678647145
1842	MID	0.161434877	0.469110122
1843	MPID	0.233489897	0.388132242
1844	MIPD	0.293693844	0.405577194
1845	MPD	0.147869008	0.362028568
1846	MID	0.142547307	0.409121487
1847	MPID	0.165745351	0.327245429
1848	MIPD	0.268034026	0.415373296
1849	MPD	0.471077144	0.322264008
1850	MID	0.433560257	0.282547047
1851	MPID	0.496264786	0.329129157
1852	MIPD	0.58425636	0.325100514
1853	MPD	0.318766903	0.50457557
1854	MID	0.245220715	0.092842903
1855	MPID	0.213855711	0.26582647
1856	MIPD	0.254088649	0.205320463
1857	MPD	0.124850968	0.214375565
1858	MID	0.318036883	0.167164605
1859	MPID	0.081072012	0.110630582
1860	MIPD	0.235565408	0.119537021
1861	MPD	0.267851679	0.283686048
1862	MID	0.372544912	0.244478965
1863	MPID	0.202024296	0.216422266
1864	MIPD	0.336889023	0.266711987
1865	MPD	0.043841676	0.367524073
1866	MID	0.156991035	0.413792875
1867	MPID	0.099532453	0.236807859
1868	MIPD	0.07090308	0.327021977
1869	MPD	0.079965575	0.183239094
1870	MID	0.113538636	0.221984754
1871	MPID	0.068351558	0.155916432
1872	MIPD	0.213807763	0.144028317
1873	MPD	0.30707983	0.377512718
1874	MID	0.153345369	0.150174762
1875	MPID	0.393943456	0.222927886
1876	MIPD	0.121801465	0.21800423
1877	MPD	0.410622099	0.333978534
1878	MID	0.275486236	0.127795901
1879	MPID	0.268806322	0.130660331
1880	MIPD	0.197069932	0.116172712
1881	MPD	0.114829289	0.336297431
1882	MID	0.141905435	0.117058134
1883	MPID	0.052802563	0.180517049
1884	MIPD	0.242222893	0.174085969
1885	MPD	0.171607485	0.211310528
1886	MID	0.151583221	0.066113193
1887	MPID	0.095154427	0.104135966
1888	MIPD	0.09598192	0.116765059
1889	MPD	0.212755754	0.637327801
1890	MID	0.636617581	0.500567734
1891	MPID	0.338737428	0.496843752
1892	MIPD	0.408394778	0.516996963
1893	MPD	0.074097267	0.361485021
1894	MID	0.146952498	0.376191505
1895	MPID	0.063034594	0.143536126
1896	MIPD	0.089952787	0.23658118
1897	MPD	0.207637681	0.202837903
1898	MID	0.120130667	0.241905642
1899	MPID	0.178903764	0.105642369
1900	MIPD	0.168394693	0.223212928
1901	MPD	0.135887368	0.362617059
1902	MID	0.19309484	0.348202825
1903	MPID	0.327406127	0.402529231
1904	MIPD	0.163608662	0.247499422
1905	MPD	0.135334066	0.447771115
1906	MID	0.100716666	0.440562902
1907	MPID	0.126475903	0.226607344
1908	MIPD	0.094737144	0.260804763
1909	MPD	0.324353361	0.539212112
1910	MID	0.242971189	0.451929824
1911	MPID	0.178162713	0.336003992
1912	MIPD	0.292127093	0.404320719
1913	MPD	0.386082178	0.277785459
1914	MID	0.357204582	0.163603355
1915	MPID	0.161897944	0.113553087
1916	MIPD	0.203162455	0.187511527
1917	MPD	0.108099046	0.156332462
1918	MID	0.339291808	0.248399197
1919	MPID	0.087299539	0.193539449
1920	MIPD	0.148383033	0.199383924
1921	MPD	0.135520087	0.282749364
1922	MID	0.156558238	0.224214025
1923	MPID	0.153753963	0.243500321
1924	MIPD	0.111891857	0.362634625
1925	MPD	0.352403378	0.631529113
1926	MID	0.803356858	0.540515033
1927	MPID	0.647186224	0.464465914
1928	MIPD	0.329435865	0.833467369
1929	MPD	0.167191298	0.272457644
1930	MID	0.619157681	0.444495126
1931	MPID	0.570802724	0.494730338
1932	MIPD	0.425985593	0.484140513
1933	MPD	0.134272807	0.413632533
1934	MID	0.298917427	0.705183899
1935	MPID	0.136060145	0.718887884
1936	MIPD	0.137020878	0.669188697
1937	MPD	0.154363257	0.283470909
1938	MID	0.307920799	0.197807845
1939	MPID	0.109404144	0.230307021
1940	MIPD	0.156683483	0.169310405
1941	MPD	0.342879735	0.352669349
1942	MID	0.464869485	0.229380538
1943	MPID	0.352324511	0.219115129
1944	MIPD	0.550808113	0.229626147
1945	MPD	0.190704061	0.394186516
1946	MID	0.293686793	0.223275926
1947	MPID	0.176747167	0.205058385
1948	MIPD	0.120479086	0.324534877
1949	MPD	0.197146378	0.625452672
1950	MID	0.367306433	0.515538292
1951	MPID	0.098643306	0.506208371
1952	MIPD	0.297375873	0.686274797
1953	MPD	0.105205677	0.320359024
1954	MID	0.150990581	0.230112222
1955	MPID	0.206228122	0.227038451
1956	MIPD	0.094438298	0.332770737
1957	MPD	0.242336962	0.445551504
1958	MID	0.128252844	0.179156036
1959	MPID	0.043334421	0.123051615
1960	MIPD	0.031055924	0.12774684
1961	MPD	0.236093676	0.374700975
1962	MID	0.490416231	0.407987091
1963	MPID	0.532008917	0.365617898
1964	MIPD	0.263666236	0.263373558
1965	MPD	0.24285208	0.452599644
1966	MID	0.216358673	0.120666798
1967	MPID	0.325108642	0.357370445
1968	MIPD	0.225452015	0.267596981
1969	MPD	0.128330498	0.301783604
1970	MID	0.085721883	0.289904456
1971	MPID	0.227928373	0.330197283
1972	MIPD	0.10144222	0.290222897
1973	MPD	0.203952747	0.238384245
1974	MID	0.105704632	0.140481776
1975	MPID	0.125193878	0.195129745
1976	MIPD	0.238139495	0.164645717
1977	MPD	0.094043268	0.183239436
1978	MID	0.088727909	0.167482461
1979	MPID	0.046260222	0.14501697
1980	MIPD	0.112292919	0.177620304
1981	MPD	0.043309384	0.421649926
1982	MID	0.1376061	0.503695335
1983	MPID	0.032419555	0.325766091
1984	MIPD	0.082062611	0.357399322
1985	MPD	0.489342684	0.603753841
1986	MID	0.998262502	0.384070433
1987	MPID	0.455153144	0.427600389
1988	MIPD	0.441815863	0.447221002
1989	MPD	0.327311347	0.431058328
1990	MID	0.082705178	0.16009913
1991	MPID	0.174291139	0.211219479
1992	MIPD	0.290458274	0.1926753
1993	MPD	0.171481072	0.141191707
1994	MID	0.235986666	0.165382716
1995	MPID	0.170918666	0.23079004
1996	MIPD	0.182762352	0.188821091
1997	MPD	0.607854927	0.325175486
1998	MID	1.102227344	0.275516681
1999	MPID	0.850388606	0.311003145
[truncated: 2,001 more rows]
